# Supplementary material for: Results of the second Ice Shelf – Ocean Model Intercomparison Project (ISOMIP+)
Source: Copernicus journal article supplement (doi:10.5194/egusphere-2025-1942), 2025-06-24
Supplement: Supplementary file 1 [file egusphere-2025-1942-supplement.pdf]

# Supplement of ‘Results of the second Ice Shelf – Ocean Model Intercomparison Project (ISOMIP+)’

Claire K. Yung<sup>1</sup>, Xylar S. Asay-Davis<sup>2</sup>, Alistair Adcroft<sup>3</sup>, Christopher Y. S. Bull<sup>4</sup>, Jan De Rydt<sup>5</sup>, Michael S. Dinniman<sup>6</sup>, Benjamin K. Galton-Fenzi<sup>7,8</sup>, Daniel Goldberg<sup>9</sup>, David E. Gwyther<sup>10</sup>, Robert Hallberg<sup>3,11</sup>, Matthew Harrison<sup>11</sup>, Tore Hattermann<sup>12</sup>, David M. Holland<sup>13</sup>, Denise Holland<sup>13</sup>, Paul R. Holland<sup>14</sup>, James R. Jordan<sup>15</sup>, Nicolas C. Jourdain<sup>16</sup>, Kazuya Kusahara<sup>17</sup>, Gustavo Marques<sup>18</sup>, Pierre Mathiot<sup>16</sup>, Dimitris Menemenlis<sup>19</sup>, Adele K. Morrison<sup>1</sup>, Yoshihiro Nakayama<sup>20,21</sup>, Olga Sergienko<sup>3</sup>, Robin S. Smith<sup>22</sup>, Alon Stern<sup>3</sup>, Ralph Timmermann<sup>23</sup>, and Qin Zhou<sup>24</sup>

<sup>1</sup>Research School of Earth Sciences and Australian Centre for Excellence in Antarctic Science, The Australian National University, Canberra, Australia

<sup>2</sup>Fluid Dynamics and Solid Mechanics, Los Alamos National Laboratory, Los Alamos, NM 87545, USA

<sup>3</sup>Atmospheric and Oceanic Sciences Program, Princeton University, Princeton, NJ, USA

<sup>4</sup>ACCESS-NRI, Australian National University, Canberra, Australia

<sup>5</sup>Department of Geography and Environmental Sciences, Northumbria University, Newcastle, UK

<sup>6</sup>Center for Coastal Physical Oceanography, Old Dominion University, Norfolk, VA, USA

<sup>7</sup>Australian Antarctic Division, Kingston, Tasmania, Australia

<sup>8</sup>Australian Antarctic Program Partnership (AAPP), Institute for Marine and Antarctic Studies, and the Australian Centre for Excellence in Antarctic Science (ACEAS), both at the University of Tasmania, Australia

<sup>9</sup>School of Geosciences, University of Edinburgh, Edinburgh, UK

<sup>10</sup>School of the Environment, The University of Queensland, St Lucia, QLD, Australia.

<sup>11</sup>NOAA/Geophysical Fluid Dynamics Laboratory, Princeton, NJ, USA

<sup>12</sup>Norwegian Polar Institute, Fram Centre, Tromsø, Norway

<sup>13</sup>Environmental Fluid Dynamics Laboratory, New York University, NY, USA

<sup>14</sup>British Antarctic Survey, Cambridge, UK

<sup>15</sup>Department of Geography, Swansea University, Swansea, UK

<sup>16</sup>Institut des Geosciences de l’Environnement, Univ. Grenoble Alpes/CNRS/IRD/G-INP/INRAE, Grenoble, France

<sup>17</sup>Japan Agency for Marine-Earth Science and Technology (JAMSTEC), Yokohama, Japan

<sup>18</sup>Climate and Global Dynamics Laboratory, National Center for Atmospheric Research, Boulder, CO, USA

<sup>19</sup>Moss Landing Marine Laboratories, Sa José State University, Moss Landing, California, USA

<sup>20</sup>Thayer School of Engineering, Dartmouth College, Hanover, NH, USA

<sup>21</sup>Institute of Low Temperature Science, Hokkaido University, Sapporo, Japan

<sup>22</sup>National Centre for Atmospheric Science, Department of Meteorology, University of Reading, Reading, UK

<sup>23</sup>Alfred-Wegener-Institut für Polar- und Meeresforschung, Bremerhaven, Germany

<sup>24</sup>Akvaplan-niva AS, 9296, Tromsø, Norway

**Correspondence:** Claire K. Yung (claire.yung@anu.edu.au)

## S1 Supplementary Figures

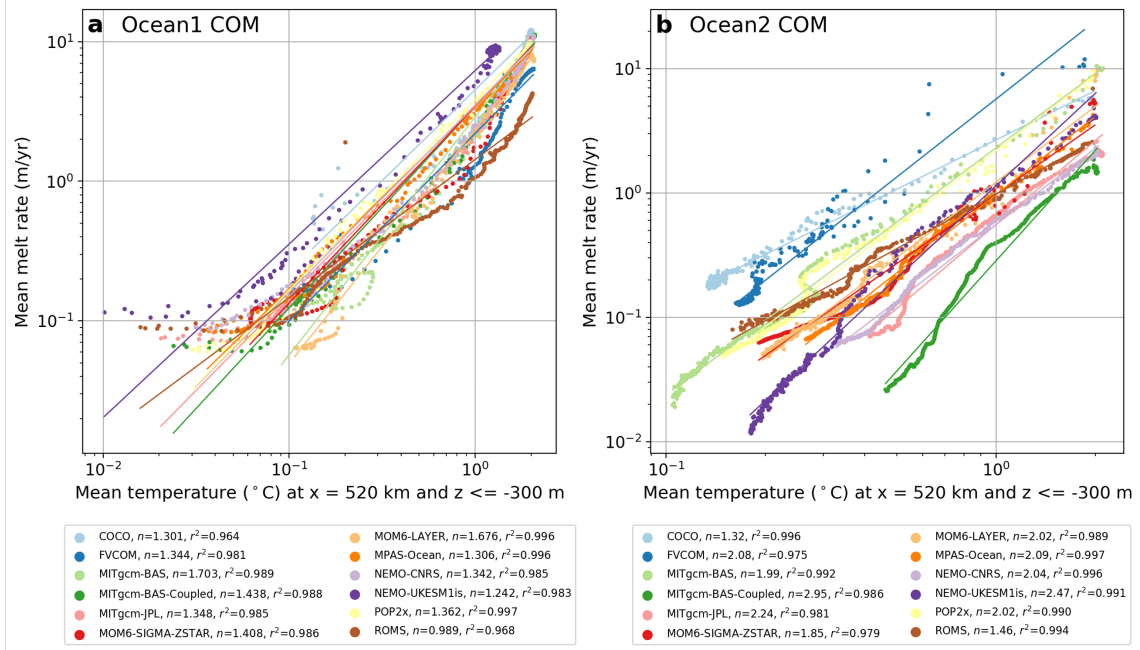

**Figure S1.** Mean melt rates as a function of ocean temperature (shifted by  $+2.1^{\circ}\text{C}$ ) at depth, near the ice front. The log-log plot is used to fit  $m = T^n$ , where  $n$  is power law exponent with  $m$  the mean melt rate and  $T$  the temperature below 300 m at the  $x = 520$  km transect.  $r^2$  is the associated Pearson correlation coefficient. Panel a shows Ocean1 COM and b shows Ocean2 COM. Pearson correlation coefficients are high, with power-law exponents averaging 1.3 for Ocean1 and 2 for Ocean2.

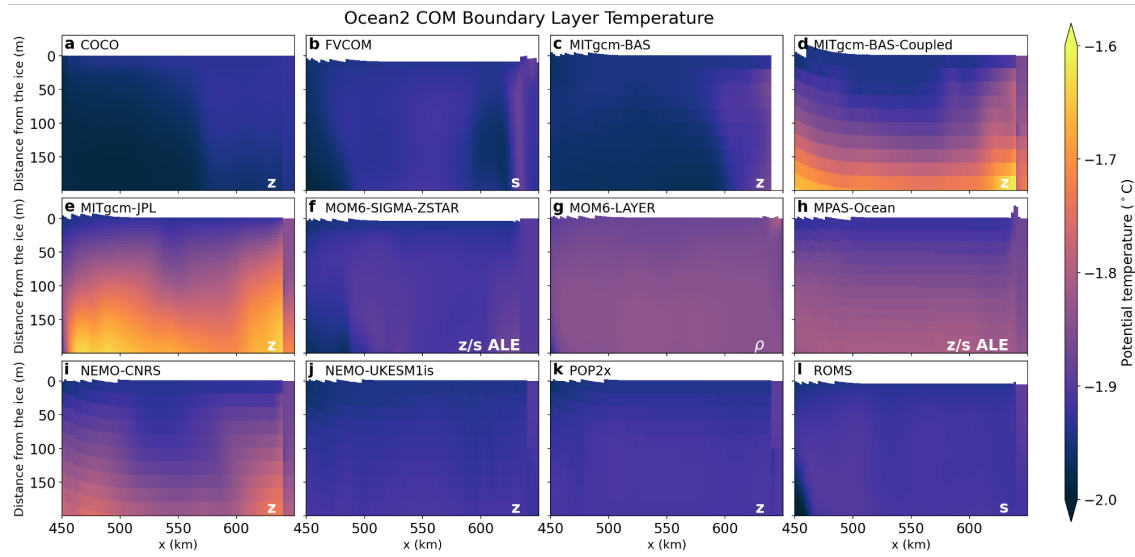

**Figure S2.** Boundary Layer Temperature, Ocean2 COM, averaged over year 20 as in Fig. 13.

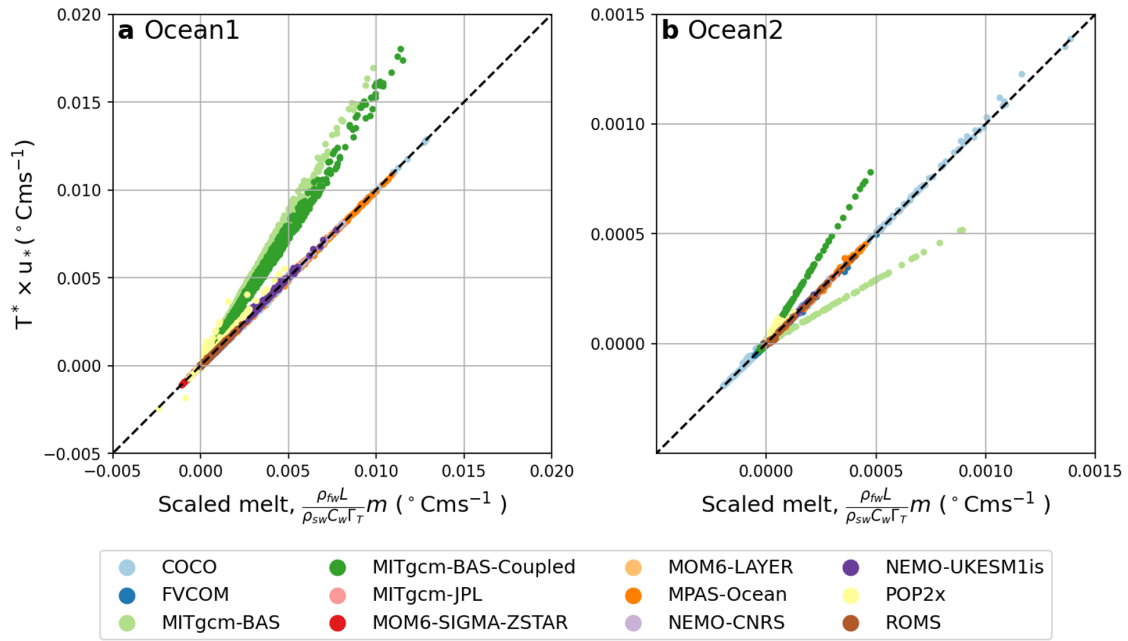

**Figure S3.** Thermal driving multiplied by friction velocity, averaged over year 20 for each model, against melt rate scaled by constants in Eqn. 1b (Table 2). Panel a shows Ocean1 COM results and Panel b shows Ocean2 COM. For MITgcm-BAS, the Ocean1 value in Table 2 is used in both panels.

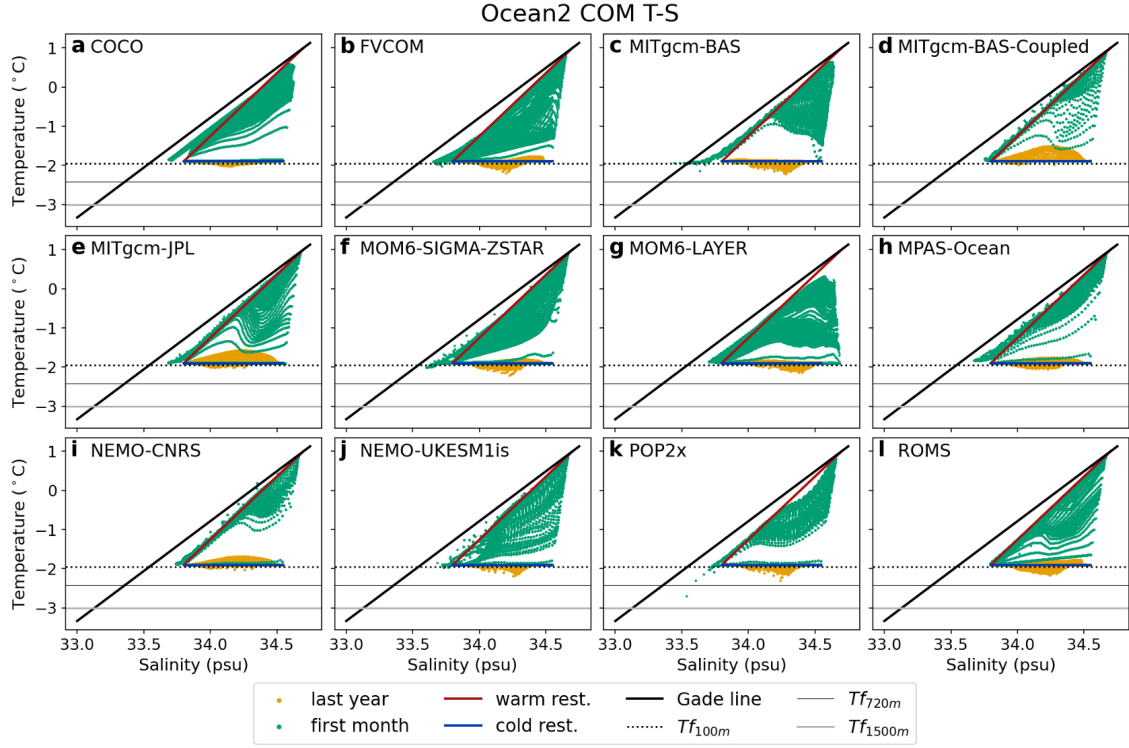

**Figure S4.** Temperature-Salinity space verification for Ocean2 COM, as in Fig. 15.

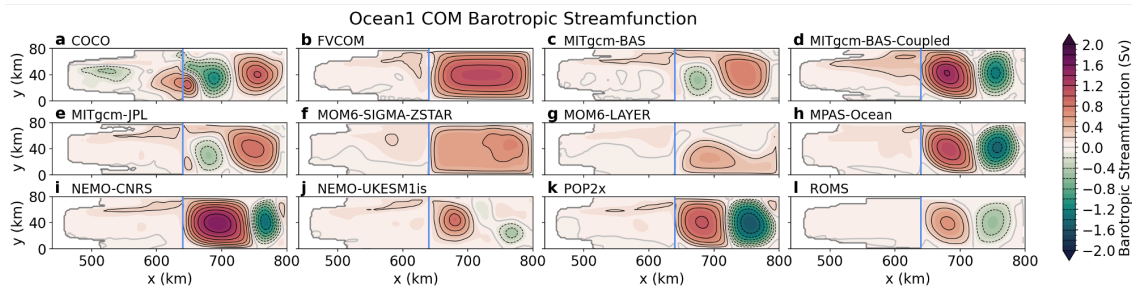

**Figure S5.** Ocean1 COM barotropic streamfunction averaged over year 20, corresponding to the steady warm state of the cavity, for the full domain.

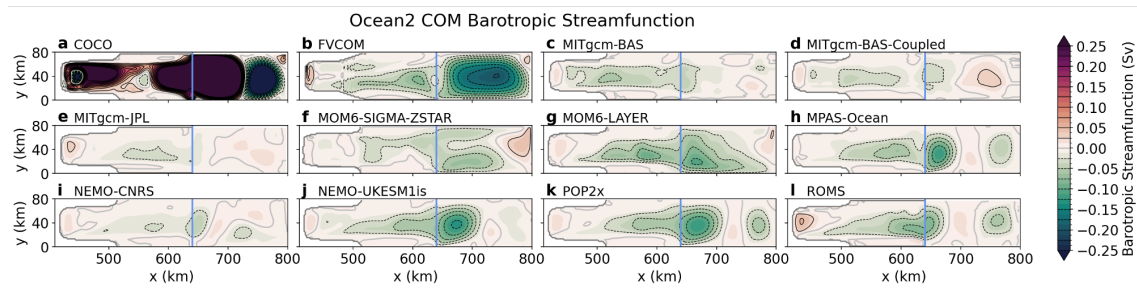

**Figure S6.** Ocean 2 COM barotropic streamfunction averaged over year 20, corresponding to the steady cold state of the cavity, for the full domain.

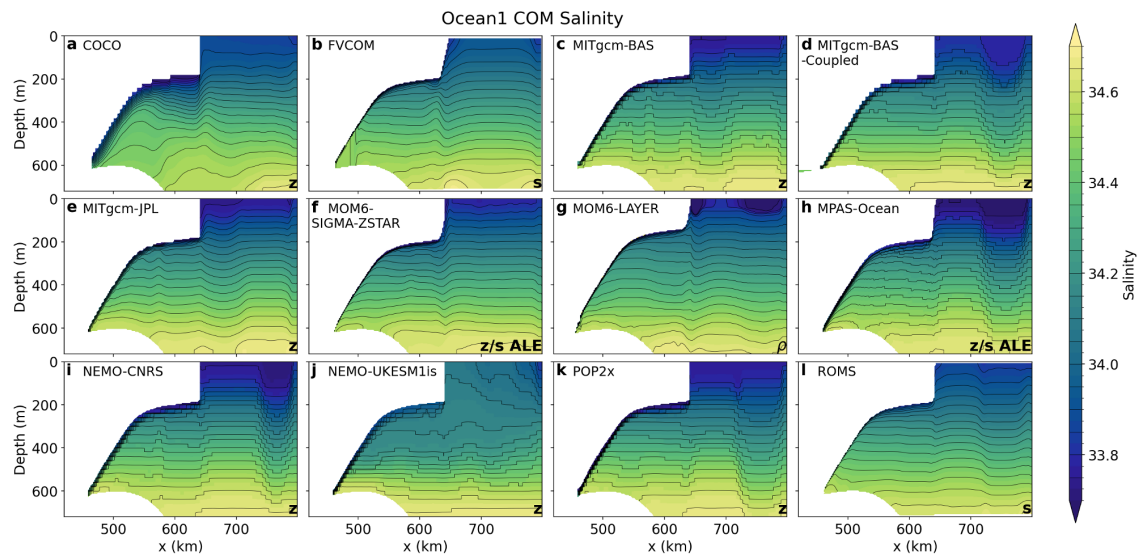

**Figure S7.** Salinity transect of Ocean1 COM through  $y = 40$  km, averaged over year 20.

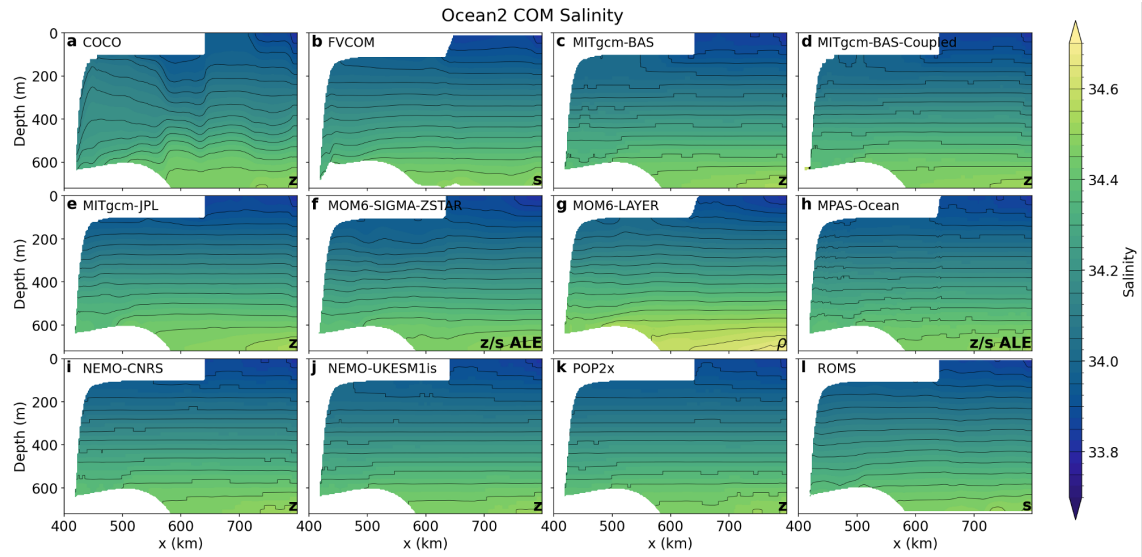

**Figure S8.** Salinity transect for Ocean2 COM through  $y = 40$  km, averaged over year 20.

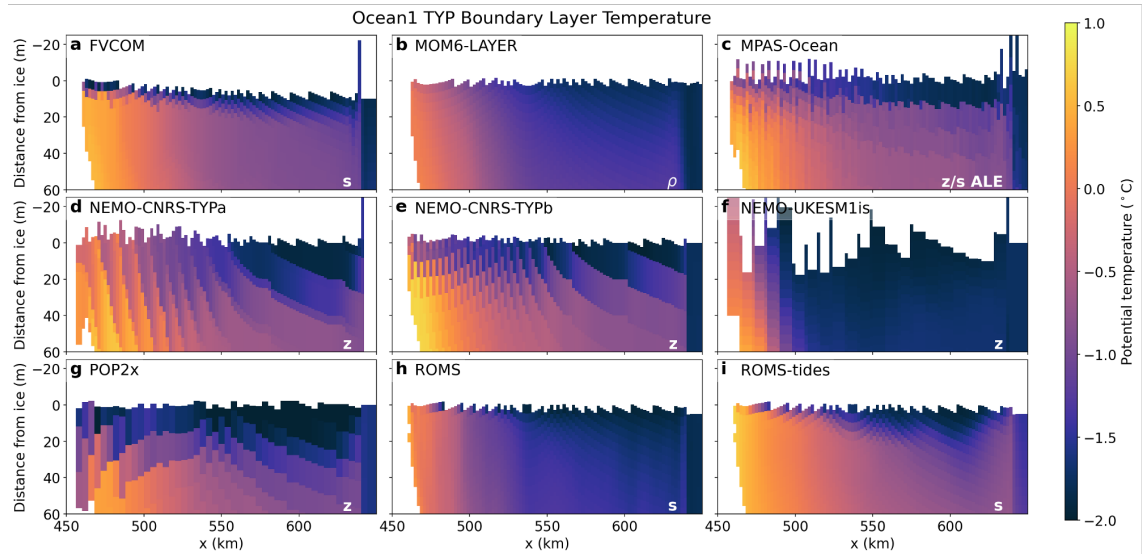

**Figure S9.** Boundary layer temperature, for Ocean1 TYP, averaged over year 20 as in Fig. 13.

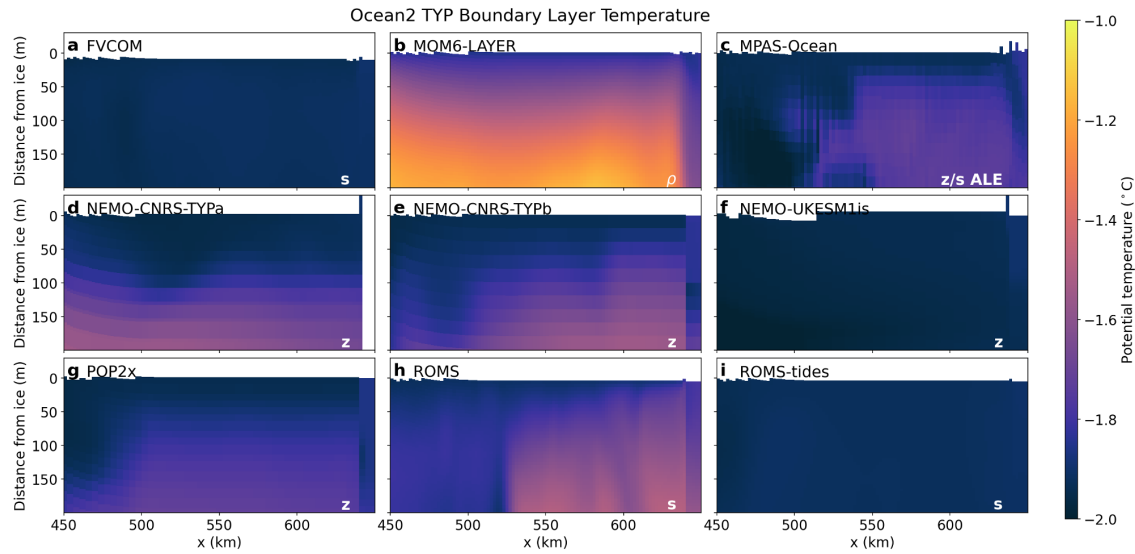

**Figure S10.** Boundary layer temperature, for Ocean2 TYP, averaged over year 20 as in Fig. 13.

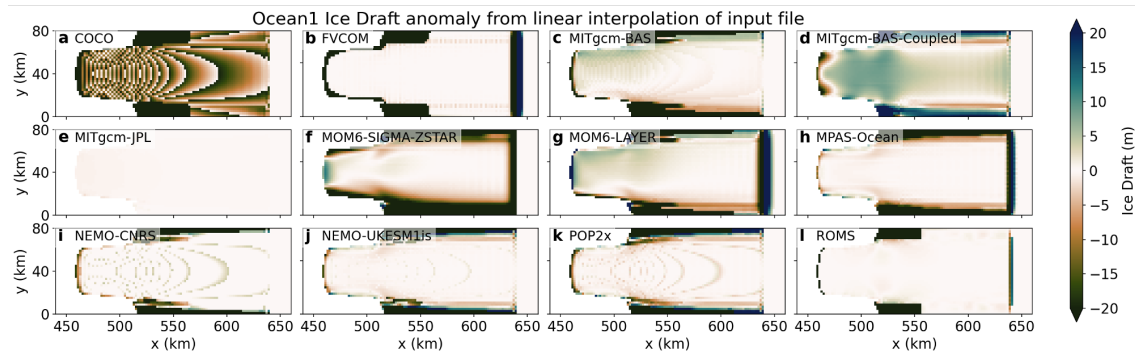

**Figure S11.** Ocean1 ice draft (position of ice-ocean interface) anomaly from linear interpolation of provided input file. Positive values have a thicker ice draft.

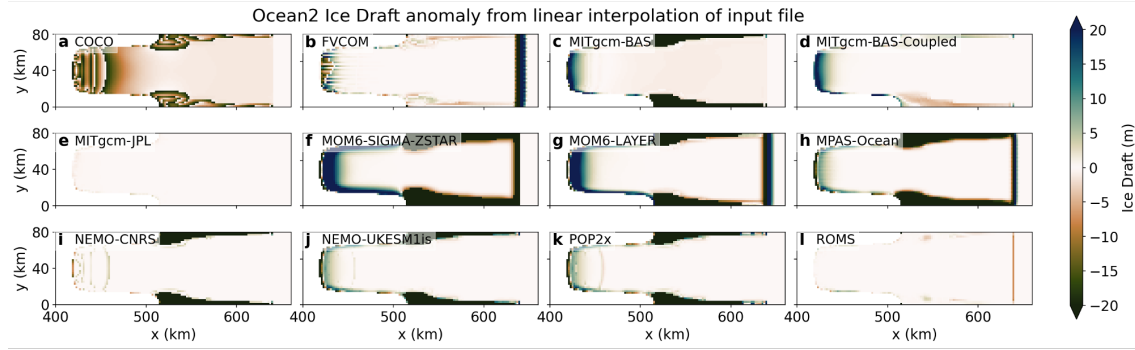

**Figure S12.** Ocean2 ice draft (position of ice-ocean interface) anomaly from linear interpolation of provided input file. Positive values have a thicker ice draft.

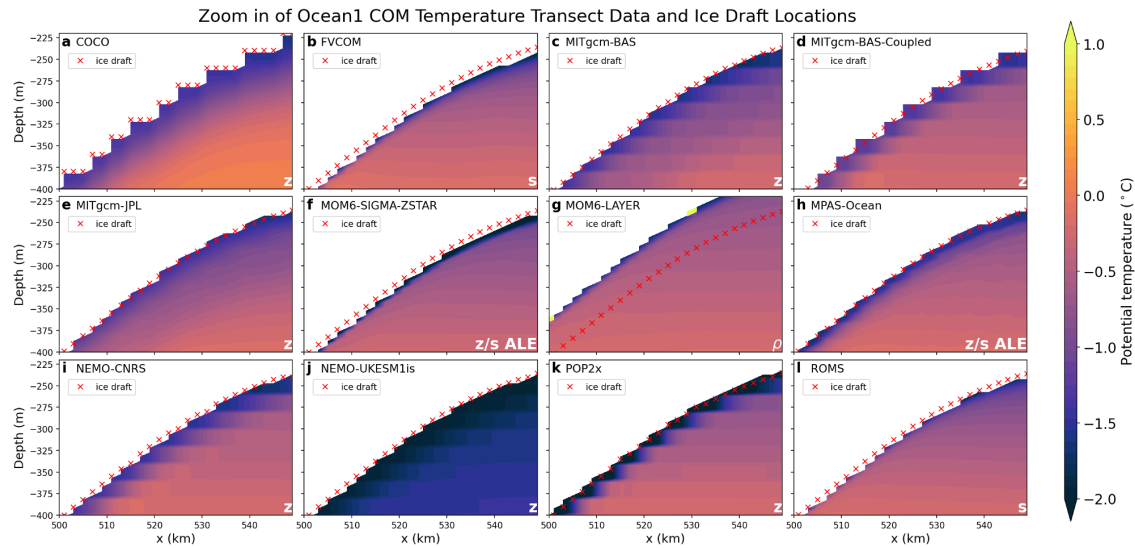

**Figure S13.** Temperature along the  $y = 40$  km transect at year 20, zoomed into the region  $x = 500$ - $550$  km, to demonstrate the ‘distance from the ice’ plotting of Fig. 13. Red crosses indicate the ice draft output and colours indicate the temperature data output, which is in 5 m depth discretisation. Modelling groups remapped their data from the model’s native grid to the native grid in different ways. Sea level rise is seen in MOM6-LAYER as the ice draft is from time zero; a correction is employed in Fig. 13 to shift the ice draft to the appropriate depth.



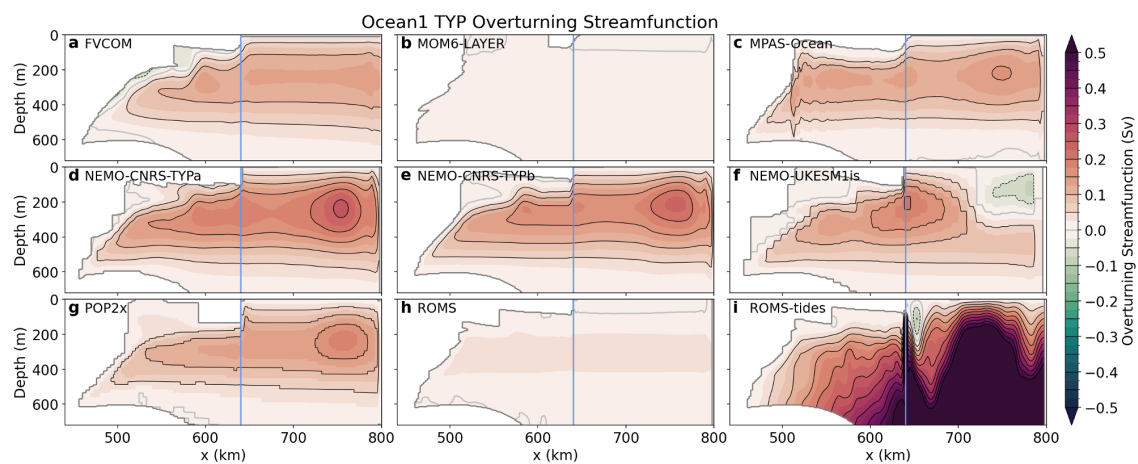

**Figure S14.** Overturning streamfunction averaged over year 20 of the Ocean1 TYP experiment.

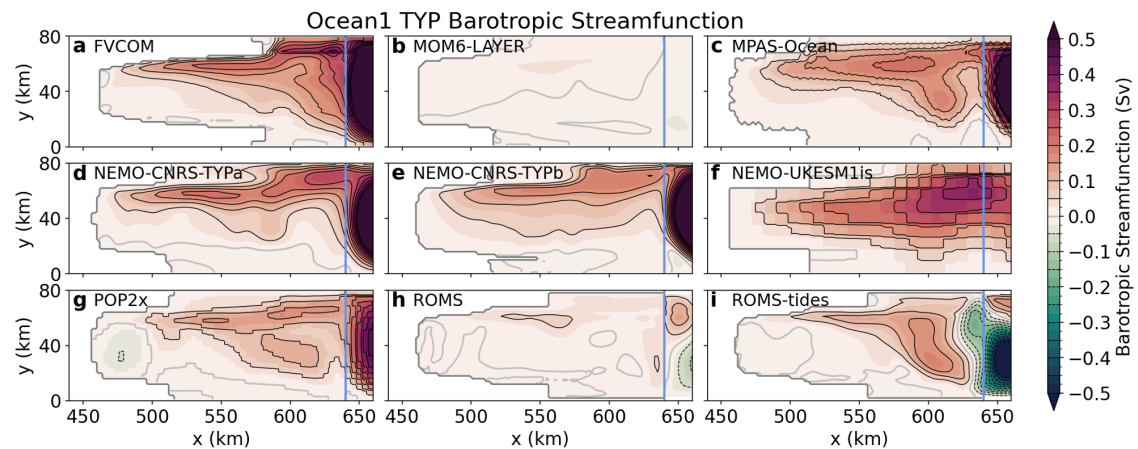

**Figure S15.** Barotropic streamfunction averaged over year 20 of the Ocean1 TYP experiment, focusing on the ice shelf cavity.
